# Supplementary material
Source: PubMed Central journal article supplement (PMC5785418)
Supplement: NIHMS931541-supplement-Supplemental.pdf [file NIHMS931541-supplement-Supplemental.pdf]

# Supporting Information

## Bacterial Adhesion is Effected by the Thickness and Stiffness of Poly(ethylene glycol) Hydrogels

Kristopher W. Kolewe<sup>1</sup>, Jiaxin Zhu<sup>2</sup>, Natalie R. Mako<sup>1</sup>, Stephen S. Nonnenmann<sup>2</sup>,  
and Jessica D. Schiffman<sup>1\*</sup>

<sup>1</sup>Department of Chemical Engineering, University of Massachusetts Amherst, Amherst, Massachusetts 01003-9303

<sup>2</sup>Department of Mechanical and Industrial Engineering, University of Massachusetts Amherst, Amherst, Massachusetts 01003-9265.

\*Corresponding author: Jessica D. Schiffman

Email: schiffman@ecs.umass.edu

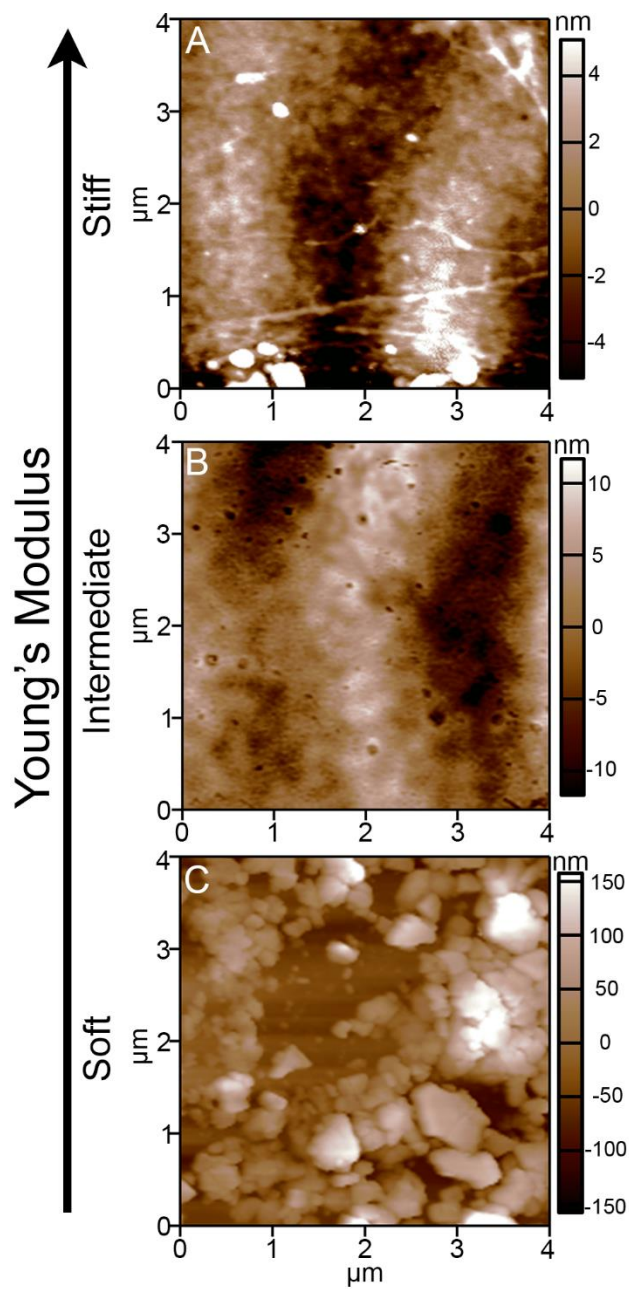

**Figure S1.** To demonstrate the need to acquire measurements on hydrated hydrogels, provided are representative AFM surface topography images of (A) soft, (B) intermediate, and (C) stiff PEG hydrogels that were dried at room temperature. Hydrogels were 150  $\mu\text{m}$  thick. A z-scale is provided alongside each image.

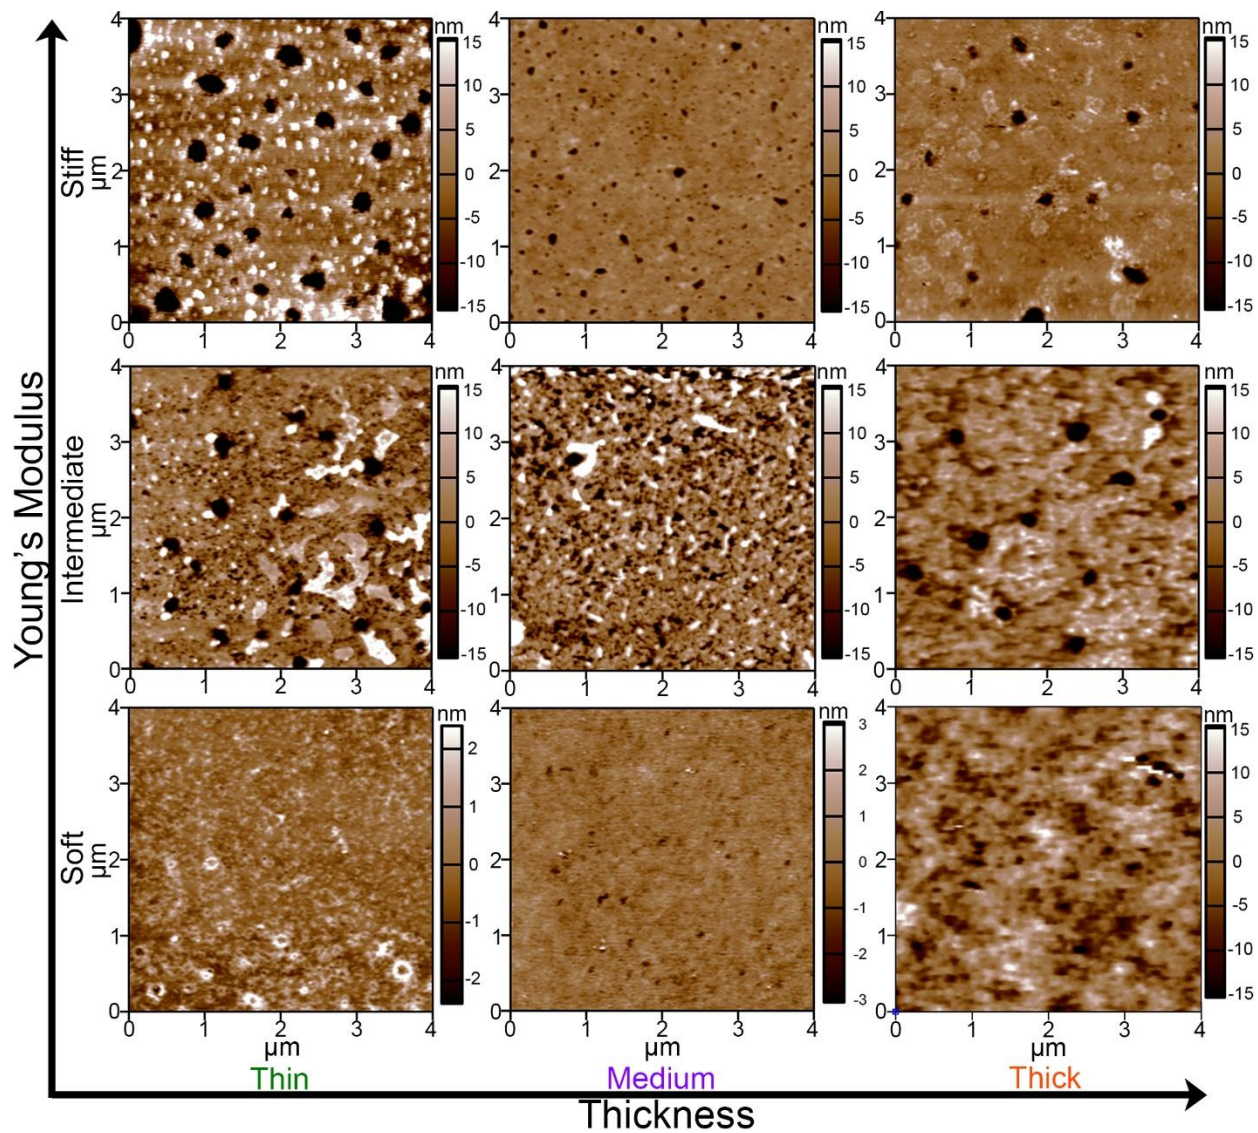

**Figure S2.** Representative AFM surface topography images of hydrated PEG hydrogels. Displayed is a grid of the hydrogels organized by Young's modulus and thickness. A z-scale is provided alongside each image.

**Table S1.** Surface roughness values for the PEG hydrogels, including, route mean square roughness ( $R_q$ ), average roughness ( $R_a$ ), skewness ( $R_{shw}$ ), kurtosis ( $R_{kur}$ ), minimum roughness ( $R_{min}$ ), and maximum roughness ( $R_{max}$ ). Standard deviation is provided.

| Hydrogel |        | $R_q$<br>(nm) | $R_a$<br>(nm) | $R_{skw}$<br>(nm) | $R_{kur}$<br>(nm) | $R_{max}$<br>(nm) | $R_{min}$<br>(nm) |
|----------|--------|---------------|---------------|-------------------|-------------------|-------------------|-------------------|
| Stiff    | Thin   | 11.03±2.0     | 8.01±1.63     | -0.75±1.10        | 3.53±4.25         | 37.99±5.78        | -78.29±31.18      |
|          | Medium | 3.71±3.29     | 2.67±2.41     | -0.82±1.14        | 5.88±4.81         | 18.01±12.64       | -27.74±23.88      |
|          | Thick  | 12.15±1.01    | 8.16±0.30     | 2.19±0.32         | 10.20±2.46        | 105.58±20.495     | -49.34±42.80      |
| Int      | Thin   | 7.27±0.50     | 4.89±0.58     | -0.46±0.52        | 7.84±2.21         | 50.76±4.8         | -58.67±0.97       |
|          | Medium | 11.98±2.60    | 8.25±1.86     | -0.18±1.07        | 5.12±1.08         | 55.90±15.99       | -66.38±11.47      |
|          | Thick  | 17.43±1.00    | 12.03±0.53    | 2.22±0.21         | 7.45±1.20         | 166.91±36.85      | -33.74±2.41       |
| Soft     | Thin   | 0.71±0.09     | 0.51±0.06     | 2.05±0.49         | 15.34±9.85        | 12.11±6.36        | -4.07±0.46        |
|          | Medium | 10.40±0.66    | 7.29±0.34     | 0.56±0.08         | 3.63±1.49         | 102.59±28.05      | -62.08±9.05       |
|          | Thick  | 9.36±3.18     | 7.141±2.5     | 0.54±0.48         | 4.39±4.33         | 75.70±14.23       | -48.76±19.81      |

†Roughness values were determined as the average of 4  $\mu\text{m}^2$  subsections of topographical scans.

**Table S2.** Properties of PEG hydrogels, including Young's modulus and mesh size ( $\xi$ ). Standard error is provided.

| Hydrogel | Young's Modulus (kPa)                |         |         |                       | $\xi$ (nm) <sup>^</sup> |
|----------|--------------------------------------|---------|---------|-----------------------|-------------------------|
|          | Atomic Force Microscopy <sup>†</sup> |         |         | Rheology <sup>‡</sup> |                         |
|          | Thin                                 | Medium  | Thick   | Bulk gel              | Bulk gel                |
| Stiff    | 950±90                               | 1000±90 | 1100±90 | 3900±700              | 1.0±0.1                 |
| Int      | 420±40                               | 280±20  | 470±20  | 330±120               | 1.9±0.04                |
| Soft     | 27±10                                | 20±11   | 32±4.0  | 29±8                  | 2.7±0.3                 |

†Measured using AFM nanoindentation. ‡Measured using oscillatory shear rheology.

<sup>^</sup>Theoretical mesh size ( $\xi$ ) was determined using a modified version of the Flory theory<sup>1</sup> using a method previously reported<sup>2</sup> and **Equation S1**:

$$\xi = v_{2,s}^{-1/3} (\bar{r}^2)^{1/2} \quad \text{Equation S1}$$

Where  $v_{2,s}$  is the swollen volume fraction of polymer and  $(\bar{r}^2)^{1/2}$  is the average end-to-end distance of the crosslinked PEG.

#### Reference:

- (1) Canal, T.; Peppas, N. Correlation between Mesh Size and Equilibrium Degree of Swelling of Polymeric Networks *J. Biomed. Mater. Res.* **1989**, 23, 1183-1193.
- (2) Kolewe, K.; Peyton, S. R.; Schiffman, J. D. Fewer Bacteria Adhere to Softer Hydrogels. *ACS Appl. Mater. Interfaces* **2015**, 7, 19562–19569.

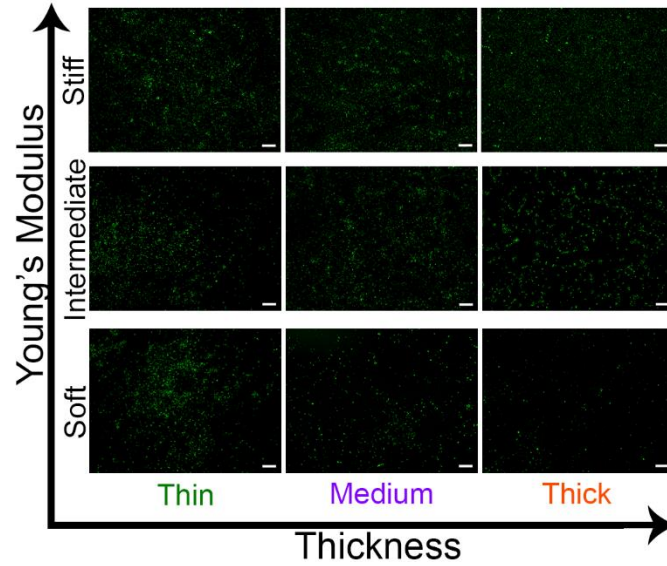

**Figure S3.** Representative fluorescent micrographs of *S. aureus* adhesion after a 24 h incubation period on thin (15  $\mu\text{m}$ ), medium (40  $\mu\text{m}$ ), and thick (150  $\mu\text{m}$ ) PEG hydrogels that were soft (30 kPa), intermediate (400 kPa), and stiff (1000 kPa). A 100  $\mu\text{m}$  scale bar is displayed.

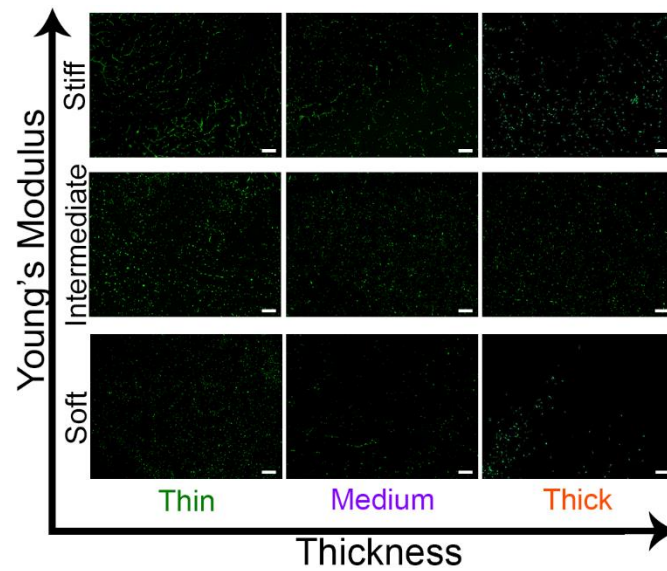

**Figure S4.** Representative fluorescent micrographs of *E. coli* adhesion after a 24 h incubation period on thin (15  $\mu\text{m}$ ), medium (40  $\mu\text{m}$ ), and thick (150  $\mu\text{m}$ ) PEG hydrogels that were soft (30 kPa), intermediate (400 kPa), and stiff (1000 kPa). A 100  $\mu\text{m}$  scale bar is displayed.
